# Supplementary material for: Protective Effects of a Novel Probiotic Bifidobacterium pseudolongum on the Intestinal Barrier of Colitis Mice via Modulating the Pparγ/STAT3 Pathway and Intestinal Microbiota
Source: MDPI journal article supplement (doi:10.3390/foods11111551), 2022-05-25
Supplement: s1 [file s1]

## Supplementary Materials

### Supplementary Material 1:

**Table S1.** Calculated disease activity index (DAI) score.

| Score | Weight loss (%) | Stool consistency | Stool bleeding             |
|-------|-----------------|-------------------|----------------------------|
| 0     | no loss         | normal            | occult blood test-negative |
| 1     | 1.0-5.0         | soft but formed   | occult blood test-positive |
| 2     | 5.0-10.0        | soft              | slight                     |
| 3     | 10.0-15.0       | slight diarrhea   | blood traces in stool      |
| 4     | more than 15.0  | watery diarrhea   | gross rectal bleeding      |

## Supplementary Material 2:

**Table S2.** Primer sequences for quantitative real-time PCR

| Gene           | Forward primer (5'–3')  | Reverse primer (5'–3') |
|----------------|-------------------------|------------------------|
| STAT3          | GAGGAGGCATTCGGAAG       | TCGTTGGTGTACACAGAT     |
| PPAR $\gamma$  | TGGGTGAACTCTGGGAGAT     | CCATAGTGGAAGCCTGATGC   |
| NF- $\kappa$ B | CGCCCCTTATCGACCACC      | CCTTCTCCCAAGAGTCGTCCA  |
| COX2           | GAAGTCTTTGGTCTGGTGCCTG  | GTCTGCTGGTTTGGAATAGTTG |
| iNOS           | CTTGGAGCGAGTTGTGGATTGTC | TAGGTGAGGGCTTGGCTGAGT  |
| Nrf2           | CCTCCGCTGCCATCAGTCAGT   | TCGGCTGGGACTCGTGTTCA   |
| MyD88          | GCATGGTGGTGGTTGTTTCTG   | GAATCAGTCGCTTCTGTTGG   |
| Occludin       | CCGGCCGCCAAGGTTC        | GCTGATGTCACTGGTCACCTA  |
| Claudin-1      | GGCTTCTCTGGGATGGATCG    | CCCCAGCAGGATGCCAATTA   |
| ZO-1           | GCCTTGAACCTTGACCTCTGC   | GAAATCGTGCTGATGTGCCA   |
| GAPDH          | AGGTCGGTGTGAACGGATTTG   | GGGGTCGTTGATGGCAACA    |

Supplementary Material 3:

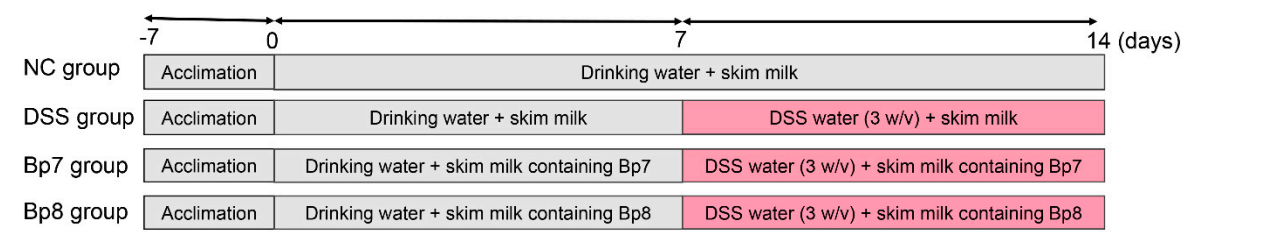

Figure S1 The flow chart of animal experiment.

## Supplementary Material 4:

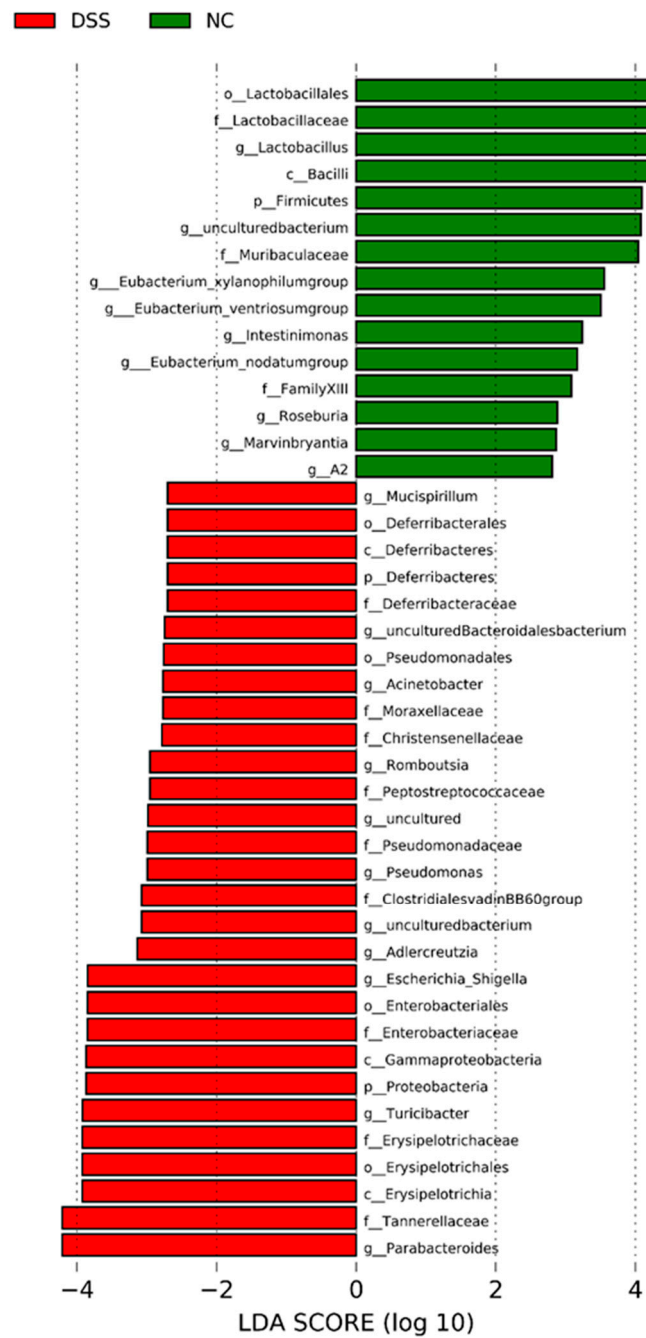

**Figure S2.** LEfSe identified the gut microbiota phylotypes with a statistically significant difference in abundance between NC and DSS groups.

## Supplementary Material 5:

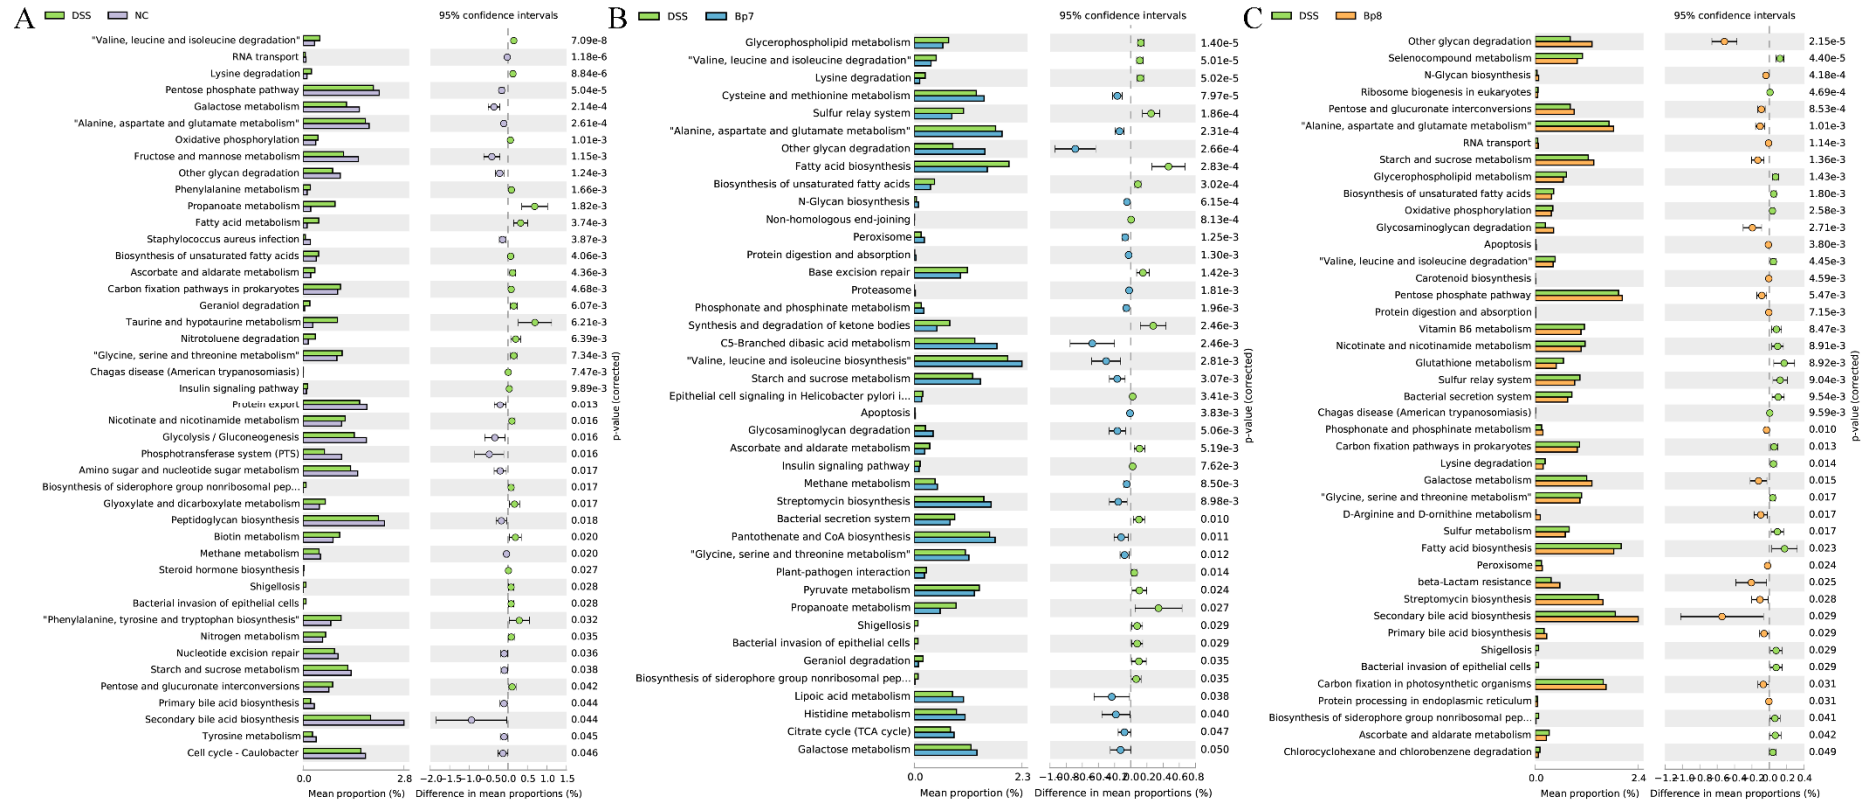

**Figure S3.** Predicted metabolic functions for the altered genes of intestinal microbiota. Metabolic pathways of NC vs DSS (A), Bp7 vs DSS (B) and Bp8 vs DSS (C).

## Supplementary Material 6:

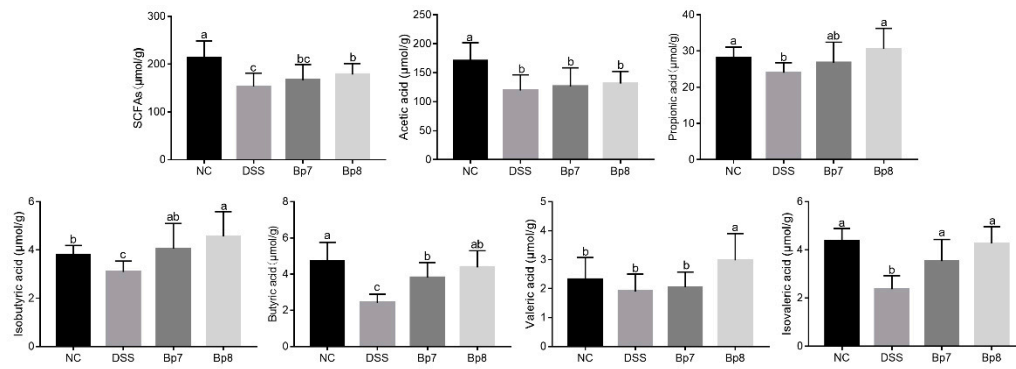

**Figure S4.** Influence of Bp7 and Bp8 intervention on the cecal SCFAs concentrations. Values are showed as the mean  $\pm$  SD (n = 8). The different letters represent significant differences between different experimental groups ( $P < 0.05$ ).
